# Low microzooplankton grazing rates in the Arctic Ocean during a *Phaeocystis pouchetii* bloom (Summer 2007): fact or artifact of the dilution technique?

ALBERT CALBET\*, ENRIC SAIZ, RODRIGO ALMEDA, JUAN IGNACIO MOVILLA AND MIQUEL ALCARAZ

INSTITUT DE CIÈNCIES DEL MAR, CSIC. PG. MARÍTIM DE LA BARCELONETA 37-49, 08003 BARCELONA, SPAIN

\*CORRESPONDING AUTHOR: [acalbet@icm.csic.es](mailto:acalbet@icm.csic.es)

Received July 13, 2010; accepted in principle October 1, 2010; accepted for publication October 4, 2010

Corresponding editor: John Dolan

We studied the structure and dynamics of the microbial community of Arctic waters during July 2007 using a microzooplankton grazing dilution approach. The sampling covered a latitudinal transect along the East Greenland Sea, and a series of stations in the high Arctic (up to 80°50'N), west and north of the Svalbard Islands. A main feature of the area was the presence of *Phaeocystis pouchetii*, which formed dense blooms. Despite the considerable biomass of microzooplankton (mostly large ciliates and dinoflagellates), their grazing impact on phytoplankton, assessed as total chlorophyll *a*, was significant in only 6 out of 16 experiments, which resulted in 8% of the standing stock being consumed on average. Overall, phytoplankton instantaneous growth rates were very low and even negative at times (range: -0.24 to 0.14; average: -0.04 for total chlorophyll), which could not be attributed to nutrient limitation nor the estimated microzooplankton grazing. We present three non-exclusive explanations for this fact: (i) we were facing a senescent community in which many organisms were dying either as a result of virus infections or for other natural causes, as corroborated by parallel estimates of natural cell mortality using membrane permeability probes; (ii) the widespread and abundant *P. pouchetii* was probably deterring grazing and adversely affecting the entire planktonic community at the time of the study; and (iii) the dilution technique failed to give a real estimate of grazing (i.e. either non-significant or positive slopes), likely as a consequence of trophic cascades (decline of major grazers in the more concentrated treatments) combined with saturated-feeding responses. This last point calls for special attention when intending to use the dilution technique in productive environments, where grazing may be saturated.

**KEYWORDS:** Arctic Ocean; microzooplankton; *Phaeocystis pouchetii*; dilution technique; food web

## INTRODUCTION

The fast melting of Arctic ice, a consequence of global warming (Cavalieri *et al.*, 2003; Johansson *et al.*, 2004),

has profound ecological consequences on Arctic wildlife, including polar bears, walrus and ringed seals, which are threatened by the reduction in sea-ice cover.

Not so evident are the changes that the inhabitants of the waters underneath and surrounding the Polar ice cap will suffer under progressive melting conditions. One of the key groups in marine food webs, which are potentially sensitive to these Arctic scenario changes, is the microzooplankton. Microzooplankton are of paramount importance in controlling primary production (Calbet and Landry, 2004). Regrettably, their role in the high Arctic still remains uncertain and needs to be determined to fully understand and predict the consequences of the changes this ecosystem will experience in the future. For instance, the relevance of the trophic impact of this group in the Arctic Ocean food web has mostly been studied either in bays or in relatively low latitude sites (Paranjape, 1987; Gifford *et al.*, 1995; Olson and Strom, 2002; Verity *et al.*, 2002; Strom and Fredrickson, 2008), or it has been derived indirectly (Levinsen *et al.*, 1999; Rysgaard *et al.*, 1999; Levinsen and Nielsen, 2002). Most of these studies indicate a strong control of primary production by microzooplankton grazing. However, recent work in high Arctic waters by Sherr *et al.* (Sherr *et al.*, 2009) questions such strong control, likely due, according to the authors, to a strong top-down impact of copepods on microzooplankton (Levinsen and Nielsen, 2002; Campbell *et al.*, 2009).

For this reason, we undertook a study of the microbial interactions in Arctic waters during the melting season. Our research coincided with a bloom of *P. pouchetii* (Lasternas and Agustí, *in press*), which will add further value to our results because, despite being a successful species in Arctic waters (Schoemann *et al.*, 2005), the very few data dealing with the impact of microzooplankton feeding on these algae have resulted in contradictory conclusions. Weisse and Scheffel-Moser (Weisse and Scheffel-Moser, 1990) measured microzooplankton grazing in a *P. cf. pouchetii* bloom in the North Sea using the dilution technique (Landry and Hassett, 1982) finding grazing loss rates from 0.037 to 0.174 h<sup>-1</sup>, grazing rates increasing in the course of the bloom and exceeding phytoplankton growth rates at the end. Gifford *et al.* (Gifford *et al.*, 1995), also using the dilution technique, did not detect any grazing on phytoplankton in the high-latitude North Atlantic Ocean during a *P. pouchetii* bloom, but they obtained increased microzooplankton grazing as the bloom declined. Archer *et al.* (Archer *et al.*, 2000) measured microzooplankton grazing impact under relatively low abundance of *P. pouchetii* in three fjords of the northern Norway, and obtained significant grazing rates on total phytoplankton and on fluorescently labeled algae of similar size to *P. pouchetii*. On the other hand, Wolfe *et al.* (Wolfe *et al.*, 2000) only found significant grazing on chlorophyll and DMSP when *P. pouchetii* cells were in poor condition in the

Labrador Sea. In this regard, the ability of microzooplankton to ingest *Phaeocystis* spp. has been widely discussed in the literature (see reviews by Whipple *et al.*, 2005; Nejstgaard *et al.*, 2007). It is usually accepted that microzooplankton exerts their pressure mostly on single cells; however, there is evidence that *Noctiluca scintillans* (Weisse *et al.*, 1994; Jakobsen and Tang, 2002) and *Gyrodinium cf. spirale* (Stelfox-Widdicombe *et al.*, 2004) are able to ingest small colonies.

## METHOD

This study was part of a multidisciplinary project (ATOS: POL2006-00550/CTM) and took place on board the research vessel BIO Hespérides from 1 to 24 July 2007. The cruise departed Reykjavik (Iceland), and sampling started northward across the Greenland Sea (Table I, Fig. 1). In Arctic waters, we sampled a series of stations in the vicinity of the ice-edge, alternating between several stations free of ice and two coastal stations near the Svalbard Islands. During the study, we reached a historical minimum of Arctic ice cover (Zhang *et al.* 2008), allowing samples to be taken from areas up to 80°50'N. The stations lasted 24 h, starting with profiles for the measurement of salinity, temperature and fluorescence during the early morning using a Seabird CTD911, followed by collection of water samples for the determination of chlorophyll *a* concentration (hereafter Chl *a*) with 12 L Niskin bottles fitted to a rosette during the ascending CTD casts.

At each station, we conducted standard grazing dilution experiments (Landry and Hassett, 1982) to assess the microzooplankton grazing impact on primary producers and on other components of the food web (see below). This technique consists of the sequential dilution of natural water with filtered seawater to obtain a gradient of net grazing impact on phytoplankton. The water for these experiments was collected at the fluorescence maximum (Table I) using a rosette equipped with 12-L Niskin bottles, according to the fluorescence profile. Once on deck, the water was gravity-filtered through a Pall Acropak 0.8/0.2 500 capsule (previously flushed, including tubing, with diluted HCl and thoroughly rinsed with deionized water), and then two replicate bottles (2.3-L acid washed polycarbonate) for each of the dilution treatments were filled with the corresponding required amount of filtered seawater. Afterwards, we added natural non-filtered seawater from the selected depth to the bottles to generate experimental water percentages of 13, 27, 50, 73 and 100%. At some stations, the presence of a dense bloom of the haptophyte *Phaeocystis pouchetii* made it impossible to

Table I: Summary of the dates of sampling (July 2007), geographic position and area, depth of sampling (m) and *in situ* chlorophyll *a* concentration ( $\mu\text{g L}^{-1} \pm \text{SE}$ ) and temperature for the different stations sampled

| Station | Date | Latitude   | Longitude  | Area           | Sampling depth | Total Chl <i>a</i> | >5 $\mu\text{m}$ Chl <i>a</i> | Temp. ( $^{\circ}\text{C}$ ) |
|---------|------|------------|------------|----------------|----------------|--------------------|-------------------------------|------------------------------|
| 2       | 2    | 70°43.19'N | 17°07.70'W | Greenland Sea  | 20             | 0.48 $\pm$ 0.02    | 0.15 $\pm$ 0.00               | -1.2                         |
| 3       | 3    | 72°57.21'N | 12°39.19'W | Greenland Sea  | 25             | 1.31 $\pm$ 0.21    | 0.79 $\pm$ 0.00               | 0                            |
| 4       | 4    | 74°53.89'N | 7°24.50'W  | Greenland Sea  | 32             | 1.41 $\pm$ 0.02    | 0.49 $\pm$ 0.01               | 0.8                          |
| 5       | 5    | 77°23.29'N | 1°40.57'W  | Arctic Ocean   | 15             | 6.67 $\pm$ 0.42    | 2.90 $\pm$ 0.13               | 4                            |
| 6       | 6    | 78°00.44'N | 2°29.94'E  | Arctic Ocean   | 23             | 1.75 $\pm$ 0.03    | 1.09 $\pm$ 0.03               | 4                            |
| 9       | 7    | 78°43.72'N | 2°58.51'E  | Arctic Ocean   | 15             | 2.97 $\pm$ 0.07    | 1.48 $\pm$ 0.03               | 5                            |
| 12      | 8    | 79°30.83'N | 7°29.74'E  | Arctic Ocean   | 20             | 5.21 $\pm$ 0.33    | 2.57 $\pm$ 0.07               | 5                            |
| 15      | 9    | 80°08.39'N | 11°19.54'E | Svalbard Coast | 20             | 3.30 $\pm$ 0.13    | 1.81 $\pm$ 0.36               | 5                            |
| 18      | 10   | 80°26.90'N | 15°35.38'E | Svalbard Coast | 35             | 2.67 $\pm$ 0.10    | 0.81 $\pm$ 0.08               | 5                            |
| 20      | 12   | 80°13.98'N | 10°10.97'E | Arctic Ocean   | 24             | 4.81 $\pm$ 0.20    | 2.31 $\pm$ 0.07               | 5                            |
| 23      | 13   | 79°22.16'N | 6°49.39'E  | Arctic Ocean   | 17             | 8.97 $\pm$ 0.63    | 5.01 $\pm$ 0.08               | 5                            |
| 27      | 15   | 79°52.71'N | 8°36.44'E  | Arctic Ocean   | 30             | 1.81 $\pm$ 0.09    | 1.38 $\pm$ 0.07               | 7.5                          |
| 33      | 17   | 80°23.46'N | 12°25.98'E | Arctic Ocean   | 25             | 1.97 $\pm$ 0.01    | 0.66 $\pm$ 0.00               | 5                            |
| 39      | 19   | 80°49.96'N | 13°12.82'E | Arctic Ocean   | 39             | 0.77 $\pm$ 0.02    | 0.28 $\pm$ 0.03               | 5                            |
| 43      | 22   | 80°25.29'N | 7°57.57'E  | Arctic Ocean   | 20             | 8.97 $\pm$ 0.21    | 2.28 $\pm$ 0.12               | -1                           |
| 46      | 23   | 79°59.15'N | 3°39.63'E  | Arctic Ocean   | 16             | 4.94 $\pm$ 0.07    | 0.73 $\pm$ 0.06               | -1.5                         |

efficiently filter the water through the Acropak capsules; therefore, filtered seawater originated from below the bloom depth.

To guarantee the homogeneity of the natural water poured from different Niskin bottles filled at the same depth, we used a 20-L intermediary carboy in which the water was gently mixed by its own flow. All the process was carried out under dim light conditions to avoid cell light-damage. To promote constant and saturated phytoplankton growth in the dilution series, each bottle received added nutrients (10  $\mu\text{M}$   $\text{NH}_4\text{Cl}$  and 0.7  $\mu\text{M}$   $\text{Na}_2\text{HPO}_4$ ). In addition, four 100% (i.e. not diluted) bottles were prepared without nutrients to assess the natural growth of the algae. Two of these latter bottles were sacrificed for initial samples. Because we did not screen the water used for the dilution series to avoid damaging delicate microzooplankton, the experimental suspension may have contained some mesozooplankton. We examined the bottles by eye to observe the presence of large copepods, and the very few times this occurred did not result in inconsistent results in the dilution series.

All bottles were incubated on deck in a large (600 L), dark incubator with open-circuit water running from a 5-m depth at a temperature about the same as *in situ*. The natural sunlight was dimmed with appropriate dark plastic mesh to mimic the light intensity at the fluorescence maximum. We gently mixed the bottles by repeatedly turning them upside down and moving them around the incubator at least three times per day. After 27–32 h, we finished the incubations and took samples for quantification of total and >5- $\mu\text{m}$  Chl *a* concentration. To further understand the actual trophic interactions during dilution experiments and to detect

possible artifacts (Dolan *et al.*, 2000; Agis *et al.*, 2007; Modigh and Franzè, 2009), we additionally took samples for the determination of nano- and microplankton from the two initials and in one of the replicates per dilution level, and preserved them with Acidic Lugol's solution (2% final concentration). To avoid damaging the delicate cells, we first added the fixative and then gently siphoned the water sample directly into the sample bottle.

For total Chl *a*, we filtered 50–250 mL of water (depending on station and dilution level) under low vacuum pressure (<100 mm Hg) through Whatmann glass fiber filters (GF/F, 25 mm diameter). For the >5- $\mu\text{m}$  fraction, we filtered 100–300-mL samples through 5- $\mu\text{m}$  pore-size polycarbonate Osmonics Inc. filters (25 mm diameter). After filtration, the filters were stored frozen at  $-20^{\circ}\text{C}$  until fluorometric analysis of acetone extracts, with and without acidification (Parsons *et al.*, 1984) on a Turner Designs Fluorometer.

Lugol-preserved samples were processed in the laboratory. We concentrated the most diluted treatments (13, 25 and 50%) by first settling the entire bottle for 72 h and gently siphoning off 50–75% of the supernatant water without re-suspending the sample. Then, for all the samples, 100 mL of the concentrate was settled in Utermöhl chambers for at least 48 h prior and counted under the microscope. The whole chamber, or a fraction of it for the smallest and more abundant organisms, was counted under an inverted microscope (XSB-1A) at 100, 250, and 400 $\times$  magnification, depending on the group. Fifty to 100 cells per group were sized, adjusted to their closest geometric shape and converted into carbon using the equations of Menden-Deuer and Lessard (Menden-Deuer and

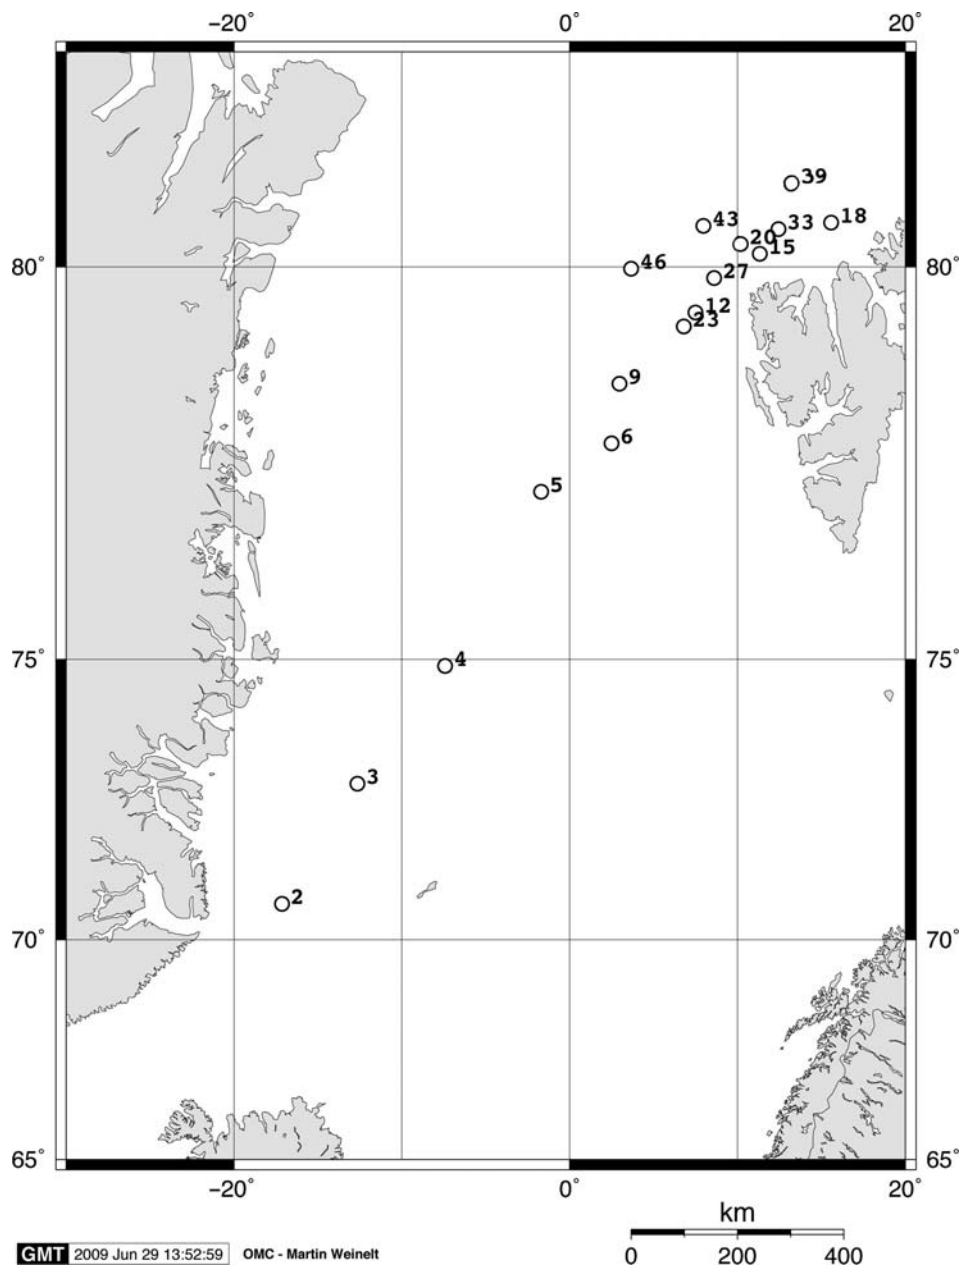

**Fig. 1.** Map of the surveyed area indicating the sampling stations.

Lessard, 2000). We did not use any correction factor to compensate for ciliate losses due to fixation, as previously suggested by Broglio *et al.* (Broglio *et al.*, 2004), and Calbet and Saiz (Calbet and Saiz, 2005), because recent research has revealed that such corrections should apply to many other planktonic groups, not only ciliates (Zarauz and Irigoien, 2008), and universal factors have not been developed yet. Because plankton were preserved with acidic Lugol's solution, no distinction between strict heterotrophs and auto/mixotrophs was made for flagellates, ciliates and some dinoflagellates.

However, the groups identified to the species level were classified trophically according to the literature.

Instantaneous growth rates in dilution grazing experiments were derived from net growth in the un-amended bottles (no nutrients added) adding the mortality by microzooplankton grazing from dilution experiments when the latter was significant. We should note that in the cases where the grazing mortality was not significant, the instantaneous growth rate of prey would be equivalent to the net growth rate in the un-amended bottles. Therefore, we may be underestimating the actual

instantaneous growth rate of the prey because some mortality may still occur in the bottles, even if not measured by the dilution method. All statistical tests were conducted with JMP 7.0 statistical software.

## RESULTS

### Plankton biomass and distribution

We present a summary of the different fractions of Chl *a* in Table I and the contribution of micro- and nanoplankton to total plankton community biomass at the sampled stations in Table II (a detailed summary of the species composition is presented in the Supplementary Material online). The main feature of the data for the Arctic stations is the almost ubiquitous presence of the haptophyte *Phaeocystis pouchetii*, which formed dense blooms (Table II, Fig. 2) and whose distribution was directly correlated with total Chl *a* ( $r = 0.76$ ,  $P < 0.01$ ), and inversely correlated with temperature ( $r = 0.77$ ;  $P < 0.05$ ). Following *P. pouchetii*, diatoms (mostly chain forming species  $>20 \mu\text{m}$  in total length of the genera *Chaetoceros*, *Fragilariopsis*, *Nitzschia*, *Rhizosolenia*, *Thalassiothrix* and *Thalassiosira*) were the second biomass grouping within the phytoplankton, being dominant in the Greenland Sea and at warmer stations. Regarding micrograzers, the important contribution of large ciliates (mostly Tintinnida, *Strombidium* spp. and the mixotroph *Laboea* spp.) was noticeable in the Greenland Sea and Svalbard Islands coastal station (Table II). Actually, ciliates were the overall major contributors to microzooplankton during the study and were substantial components of the total plankton biomass (ca. 25%), whereas

heterotrophic dinoflagellates (considering 50% of unidentified dinoflagellates as heterotrophic; Lessard and Swift, 1985; Sherr and Sherr, 2007) represented, on average, 12% of the total carbon biomass (Table II). In relation to the relevance of heterotrophs, it is interesting to note that the quotient between heterotrophic and autotrophic carbon (indicative of the trophic characteristics of the system) was  $>1$  in the Greenland Sea and Svalbard Islands coastal stations (Fig. 3).

Despite the high heterotrophic biomass, we did not find significant correlations between any of the size-fractions of Chl *a*, large heterotrophic dinoflagellates (e.g. *Gyrodinium* spp., *Protoberidinium* spp. and *Katodinium* spp.) and ciliates. However, large mixotrophic dinoflagellates (*Dinophysis* spp., *Ceratium* spp., *Gonyaulax* spp. and *Amphidinium* spp.) were positively correlated with diatoms ( $r = 0.85$ ;  $P < 0.05$ ). Correlations between groups do not necessarily mean causality, but they can indicate that an association exists. Likewise, unidentified  $>20\text{-}\mu\text{m}$  dinoflagellates were also positively correlated with *P. pouchetii* biomass ( $r = 0.72$ ;  $P < 0.05$ ). However, when excluded from the analysis Station 43 (the station with the maximum biomass of *P. pouchetii*), this relationship is strongly affected and it becomes non-significant.

We calculated the C:Chl *a* ratios using the Chl *a* data and the autotrophic biomass (in carbon), obtained by cell counting and conversion to carbon using literature equations (Table II). For unidentified dinoflagellates, we assumed 50% of the organisms were phototrophs. Because our microscope counting technique, based on Lugol-preserved samples, does not allow for good resolution of the lower size-fractions, we can better estimate the C:Chl *a* ratio using only  $>5\text{-}\mu\text{m}$  Chl *a*. The values averaged 18 for the entire data set, and ranged from 4 to 47.

Table II: In situ biomass in  $\mu\text{gC L}^{-1}$  of the different protist groups considered at the stations sampled

| Station | Diatoms     | Nanoflag.   | <i>P. pouchetii</i> | <20 $\mu\text{m}$ dinoflagellates | >20 $\mu\text{m}$ dinoflagellates | Mixo. dinoflagellates | Het. dinoflagellates | <20 $\mu\text{m}$ ciliates | >20 $\mu\text{m}$ ciliates | Total biomass | C/>5 $\mu\text{m}$ Chl <i>a</i> |
|---------|-------------|-------------|---------------------|-----------------------------------|-----------------------------------|-----------------------|----------------------|----------------------------|----------------------------|---------------|---------------------------------|
| 2       | 1.25 (0.07) | 0.36 (0.06) | 0.00 (0.00)         | 0.51 (0.08)                       | 0.24 (0.03)                       | 0.24 (0.02)           | 0.28 (0.07)          | 4.48 (0.46)                | 34.91 (4.88)               | 42.26         | 14.03                           |
| 3       | 1.55 (0.21) | 3.12 (0.05) | 0.00 (0.00)         | 0.84 (0.02)                       | 0.22 (0.03)                       | 0.12 (0.01)           | 0.08 (0.00)          | 4.74 (0.33)                | 50.53 (4.00)               | 61.18         | 4.75                            |
| 4       | 1.26 (0.15) | 0.60 (0.01) | 0.83 (0.12)         | 0.77 (0.12)                       | 0.57 (0.01)                       | 0.72 (0.08)           | 0.43 (0.08)          | 12.2 (0.00)                | 20.90 (2.31)               | 38.31         | 7.73                            |
| 5       | 1.77 (0.47) | 0.51 (0.12) | 2.81 (0.32)         | 14.1 (3.40)                       | 0.26 (0.06)                       | 1.76 (0.28)           | 0.47 (0.13)          | 0.66 (0.19)                | 11.49 (3.03)               | 33.83         | 4.75                            |
| 6       | 1.53 (0.05) | 3.78 (0.81) | 12.2 (2.30)         | 10.3 (4.38)                       | 0.87 (0.23)                       | 1.20 (0.27)           | 0.69 (0.13)          | 3.70 (0.11)                | 6.08 (1.66)                | 40.42         | 20.64                           |
| 9       | 1.79 (0.11) | 1.02 (0.09) | 1.59 (0.10)         | 1.93 (0.32)                       | 0.34 (0.03)                       | 0.72 (0.06)           | 0.15 (0.02)          | 0.40 (0.11)                | 0.83 (0.06)                | 8.77          | 3.88                            |
| 12      | 0.81 (0.03) | 1.81 (0.05) | 5.90 (0.82)         | 1.49 (0.04)                       | 0.75 (0.11)                       | 0.11 (0.04)           | 0.17 (0.01)          | 1.91 (0.15)                | 0.94 (0.27)                | 13.88         | 3.44                            |
| 15      | 2.97 (0.48) | 3.82 (0.12) | 13.0 (1.27)         | 5.56 (0.14)                       | 3.09 (0.74)                       | 0.99 (0.05)           | 1.53 (0.24)          | 2.45 (0.33)                | 15.09 (6.67)               | 48.50         | 12.80                           |
| 18      | 0.18 (0.02) | 4.01 (1.87) | 1.19 (0.71)         | 6.14 (0.72)                       | 5.24 (0.28)                       | 0.27 (0.05)           | 3.33 (0.67)          | 2.12 (0.15)                | 59.9 (7.61)                | 82.38         | 11.46                           |
| 20      | 4.24 (0.36) | 3.43 (0.22) | 14.8 (2.40)         | 3.99 (0.07)                       | 3.89 (0.73)                       | 0.98 (0.08)           | 0.57 (0.17)          | 6.59 (0.42)                | 4.52 (0.50)                | 43.02         | 10.39                           |
| 23      | 67.8 (5.19) | 3.10 (0.39) | 24.8 (2.63)         | 5.00 (0.28)                       | 1.79 (0.53)                       | 3.65 (1.20)           | 0.65 (0.11)          | 5.73 (0.21)                | 7.12 (0.81)                | 119.58        | 20.18                           |
| 27      | 25.1 (1.21) | 1.36 (0.10) | 0.09 (0.01)         | 5.49 (0.34)                       | 1.91 (0.10)                       | 2.55 (0.23)           | 0.51 (0.04)          | 0.81 (0.24)                | 1.74 (0.38)                | 39.59         | 23.22                           |
| 33      | 6.47 (0.38) | 2.33 (0.28) | 7.89 (4.22)         | 3.36 (0.47)                       | 2.70 (0.53)                       | 1.05 (0.17)           | 0.70 (0.05)          | 4.56 (0.13)                | 5.60 (0.63)                | 34.67         | 29.68                           |
| 39      | 6.73 (1.05) | 1.61 (0.15) | 1.79 (0.04)         | 2.10 (0.08)                       | 2.50 (0.39)                       | 0.25 (0.03)           | 0.34 (0.04)          | 1.45 (0.25)                | 1.02 (0.20)                | 17.78         | 42.16                           |
| 43      | 6.09 (0.78) | 1.15 (0.20) | 49.0 (7.40)         | 1.96 (0.20)                       | 9.73 (2.02)                       | 1.37 (0.06)           | 1.08 (0.16)          | 2.77 (0.27)                | 4.77 (0.73)                | 77.93         | 27.63                           |
| 46      | 3.67 (0.18) | 2.52 (0.06) | 25.7 (9.41)         | 1.65 (0.39)                       | 2.33 (0.34)                       | 1.39 (0.21)           | 1.02 (0.02)          | 5.94 (0.57)                | 3.43 (0.12)                | 47.61         | 46.53                           |

Numbers between parentheses are SE of two replicates. The quotients 'total carbon/  $>5 \mu\text{m}$  Chl *a*' are also shown.



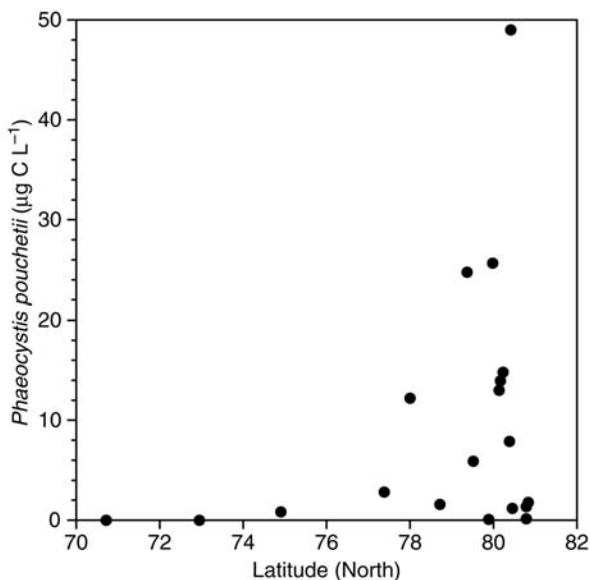

Fig. 2. *Phaeocystis pouchetii* biomass as related to latitude.

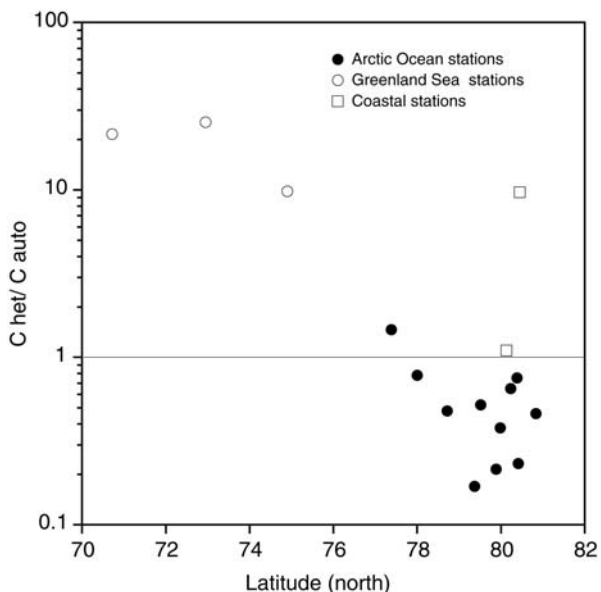

Fig. 3. The quotient heterotrophic carbon/autotrophic carbon as a function of latitude. Greenland Sea and Coastal stations are indicated, the rest of stations correspond to Arctic Ocean open waters.

### Dilution grazing experiments

Table III shows the outcome of the dilution grazing experiments based on the different size-fractions of Chl *a*. Unanticipated results from these experiments include the following: (i) the little, or even at times negative, phytoplankton instantaneous growth (range:  $-0.24$  to  $0.14$ ; average  $-0.04$  for total Chl *a*) and (ii) the low microzooplankton grazing impact on primary producers. Significant microzooplankton grazing (i.e.

significant negative slopes in the dilution experiments) was found only in 6 out of 16 experiments for total and  $<5\text{-}\mu\text{m}$  Chl *a*, and no significant mortality was detected in the  $>5\text{-}\mu\text{m}$  fraction at any of the stations. Overall, microzooplankton grazing cannot explain the observed phytoplankton negative net growth rates (especially in the  $>5\text{-}\mu\text{m}$  size-fractions) and must be attributed to other causes (see Discussion). However, it is interesting to note the inverse relationship between the phytoplankton net growth rates (K) and Chl *a* concentration (Fig. 4) in the Arctic Ocean stations. This points towards a naturally occurring, density-dependent mortality effect, probably linked to the presence of *Phaeocystis pouchetii*, although not significantly related to the occurrence of either this or any other planktonic group. Likewise, and related to net phytoplankton growth rates, there was no clear evidence of nutrient limitation at most of the stations (Fig. 5).

The phytoplankton and microzooplankton composition analysis in the initial and final dilution experiments revealed a very complex food web scenario, with frequent negative growth rates both for autotrophs and heterotrophs, frequent positive slopes and very few cases of significant microzooplankton grazing impact (Table IV). Overall, it is difficult to extract any clear interpretation or global pattern out of the dilution data for the different plankton groups. Nevertheless, we decided to present these data because negative dilution grazing results in the literature have seldom been discussed (Dolan and McKeon, 2005). As an example, we show in Fig. 6 the dilution experiment plots for Stations 4 and 33. It is interesting to note in these plots the positive slopes for some prey and the negative slopes (theoretically indicative of grazing) for some potential grazers of phytoplankton. It should be noted that the mortality rates of top predators (large ciliates and heterotrophic dinoflagellates) are not necessarily estimated well by the dilution method. However, we think the information about the changes of these groups in the incubation bottles is relevant and should be also presented in the results.

## DISCUSSION

### Community composition and microzooplankton grazing on phytoplankton

A main characteristic that distinguishes our study from previous ones in Arctic waters is the peculiarity of the composition of the heterotrophic microbial community. Past works stressed the relevance of heterotrophic dinoflagellates in Arctic waters, especially when diatoms

Table III: Dilution grazing experiments. Phytoplankton instantaneous growth rates without nutrients ( $\mu \pm SE$ ;  $\text{day}^{-1}$ ) and mortality rates ( $m \pm SE$ ;  $\text{day}^{-1}$ ) for total and the two fractions of chlorophyll *a* at the different stations

| Station | $\mu$ (total) | $m$ (total)               | $r^2$ (total) | $\mu$ (<5 $\mu\text{m}$ ) | $m$ (<5 $\mu\text{m}$ )    | $r^2$ (<5 $\mu\text{m}$ ) | $\mu$ (>5 $\mu\text{m}$ ) | $m$ (>5 $\mu\text{m}$ ) | %SS  |
|---------|---------------|---------------------------|---------------|---------------------------|----------------------------|---------------------------|---------------------------|-------------------------|------|
| 2       | 0.12 ± 0.029  | ns                        | –             | 0.10 ± 0.035              | ns                         | –                         | 0.17 ± 0.14               | ns                      | 0.0  |
| 3       | 0.07 ± 0.11   | ns                        | –             | –0.05 ± 0.019             | ns                         | –                         | 0.13 ± 0.18               | ns                      | 0.0  |
| 4       | –0.23 ± 0.11  | –0.31 ± 0.11              | 0.50          | –0.39 ± 0.25              | –0.44 ± 0.19               | 0.45                      | –0.22 ± 0.13              | ns                      | 23.9 |
| 5       | –0.11 ± 0.077 | –0.13 ± 0.039             | 0.59          | 0.00 ± 0.21               | –0.34 ± 0.056              | 0.84                      | –0.15 ± 0.069             | ns                      | 11.6 |
| 6       | –0.05 ± 0.010 | ns                        | –             | 0.29 ± 0.11               | –0.30 ± 0.086 <sup>a</sup> | 0.67                      | –0.03 ± 0.050             | ns                      | 0.0  |
| 9       | –0.11 ± 0.046 | ns                        | –             | –0.33 ± 0.026             | ns                         | –                         | 0.07 ± 0.090              | ns                      | 0.0  |
| 12      | 0.15 ± 0.113  | –0.31 ± 0.11 <sup>b</sup> | 0.73          | –0.25 ± 0.026             | ns                         | –                         | –0.08 ± 0.022             | ns                      | 28.6 |
| 15      | 0.09 ± 0.030  | ns                        | –             | –0.16 ± 0.24              | ns                         | –                         | 0.23 ± 0.079              | ns                      | 0.0  |
| 18      | –0.06 ± 0.059 | ns                        | –             | –0.11 ± 0.00              | ns                         | –                         | 0.19 ± 0.036              | ns                      | 0.0  |
| 20      | –0.24 ± 0.015 | ns                        | –             | –0.29 ± 0.031             | ns                         | –                         | –0.19 ± 0.060             | ns                      | 0.0  |
| 23      | –0.24 ± 0.00  | ns                        | –             | –0.48 ± 0.15              | ns                         | –                         | –0.09 ± 0.07              | ns                      | 0.0  |
| 27      | –0.04 ± 0.043 | ns                        | –             | –0.04 ± 0.16              | ns                         | –                         | –0.04 ± 0.007             | ns                      | 0.0  |
| 33      | 0.14 ± 0.081  | –0.24 ± 0.073             | 0.57          | 0.00 ± 0.11               | –0.30 ± 0.11               | 0.48                      | –0.06 ± 0.041             | ns                      | 22.9 |
| 39      | –0.04 ± 0.022 | ns                        | –             | –0.05 ± 0.002             | ns                         | –                         | –0.03 ± 0.061             | ns                      | 0.0  |
| 43      | 0.01 ± 0.152  | –0.35 ± 0.15              | 0.41          | –0.05 ± 0.19              | –0.46 ± 0.19 <sup>a</sup>  | 0.45                      | 0.17 ± 0.069              | ns                      | 29.7 |
| 46      | 0.01 ± 0.030  | –0.16 ± 0.027             | 0.83          | –0.02 ± 0.43              | –0.25 ± 0.058              | 0.70                      | 0.34 ± 0.70               | ns                      | 14.9 |

%SS correspond to the calculated impact on the phytoplankton standing stock. Determination coefficient for the regression analysis is also provided. SE error for  $\mu$  was obtained using the equation  $(SE_k^2 + SE_m^2)^{1/2}$  where  $SE_k$  is the SE of the average of the 100% un-amended bottles and  $SE_m$  is the standard error associated to the slope of the regression equation (when significant).

ns, not significant ( $P > 0.05$ );

<sup>a</sup>one outlier removed.

<sup>b</sup>Grazing saturation: 3-point method used (Gallegos 1989);

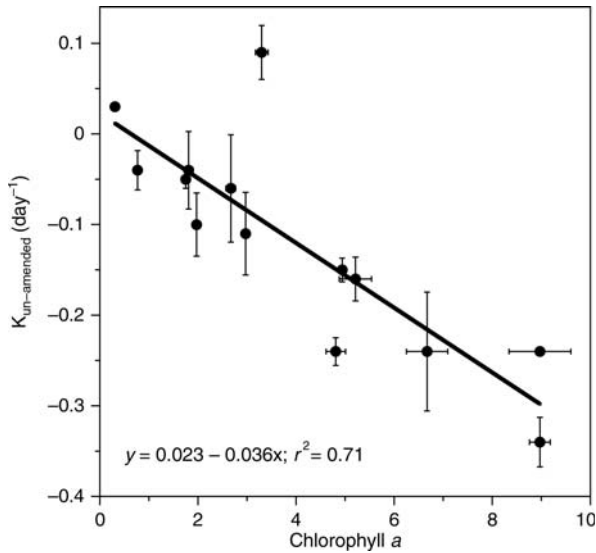

Fig. 4. Relationship between net phytoplankton growth rates in the un-amended (without added nutrients) bottles ( $\text{day}^{-1}$ ) and chlorophyll *a* concentration ( $\mu\text{g Chl } a \text{ L}^{-1}$ ).

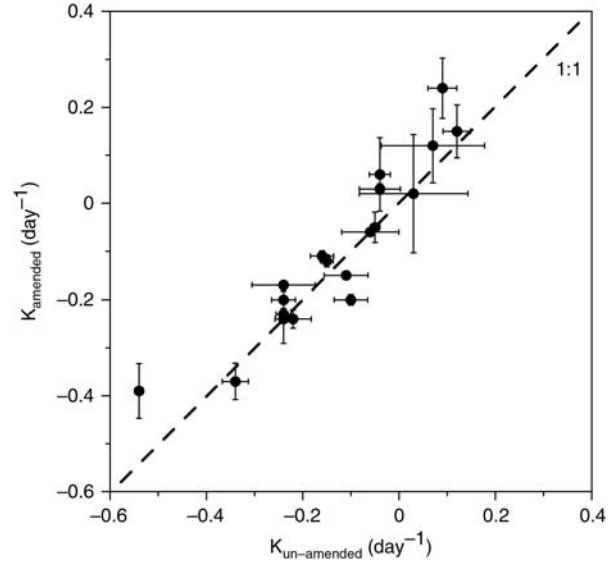

Fig. 5. Comparison of net phytoplankton growth rates (from total Chl *a* analysis) in bottles amended (with added nutrients) and un-amended. The discontinuous line represents the 1:1.

dominated the autotrophic community (Levinsen *et al.*, 1999; Rysgaard *et al.*, 1999; Sherr *et al.*, 1997, 2009; Sherr and Sherr, 2007). We found a population rich in ciliates, which accounted for ca. 2/3 of the total microzooplankton biomass (assuming 50% of the unidentified dinoflagellates were heterotrophs). This high contribution was especially evident in the Greenland Sea, where they

completely dominated the microplankton. We suspect that in these waters, we were facing a very unusual situation, likely the result of temporal imbalances in the structure of the community (e.g. the end of a phytoplankton bloom), as the biomass of producers seems unable to maintain such a high abundance of grazers.

Table IV: Dilution grazing experiments. Instantaneous growth rates without nutrients ( $\mu$ ;  $\text{day}^{-1}$ ) and mortality rates ( $m$ ;  $\text{day}^{-1}$ ) for the different planktonic groups considered

| Plankton group             | St. 2 | St. 3 | St. 4 | St. 5 | St. 6 | St. 9 | St. 12 | St. 15 | St. 18 | St. 20 | St. 23 | St. 27 | St. 33 | St. 39 | St. 43 | St. 46 |
|----------------------------|-------|-------|-------|-------|-------|-------|--------|--------|--------|--------|--------|--------|--------|--------|--------|--------|
| Diatoms                    |       |       |       |       |       |       |        |        |        |        |        |        |        |        |        |        |
| $\mu$                      | -0.10 | 0.83  | -0.21 | -0.41 | 0.02  | 0.82  | 1.49   | 0.24   | -0.38  | 0.21   | -0.03  | -0.36  | -0.20  | -0.08  | 0.05   | 0.17   |
| $m$                        | ns    | ns    | ns    | ns    | ns    | 1.16  | ns     | 1.08   | ns     | ns     | ns     | ns     | 0.68   | ns     | ns     | 0.72   |
| $r^2$                      |       |       |       |       |       | 0.91  |        | 0.86   |        |        |        |        | 0.92   | 0.66   |        | 0.93   |
| Nanoflagellates            |       |       |       |       |       |       |        |        |        |        |        |        |        |        |        |        |
| $\mu$                      | -0.08 | 0.69  | -0.22 | 0.58  | 0.08  | 0.99  | 0.87   | 0.62   | -0.06  | -0.42  | -0.06  | -0.62  | 0.62   | 0.12   | -0.18  | -0.61  |
| $m$                        | ns    | ns    | 1.19  | ns    | -0.33 | ns    | ns     | 1.59   | ns     | ns     | ns     | ns     | 1.38   | 0.95   | 0.66   | 1.05   |
| $r^2$                      |       |       | 0.91  |       | 0.96  |       |        | 0.96   |        |        |        |        | 0.94   | 0.81   | 0.77   | 0.79   |
| <i>P. pouchetii</i>        |       |       |       |       |       |       |        |        |        |        |        |        |        |        |        |        |
| $\mu$                      | nd    | nd    | -0.47 | 0.95  | -3.97 | 1.20  | 0.87   | -0.02  | 0.44   | -0.37  | 0.04   | 0.11   | -0.62  | -0.21  | -0.25  | 0.19   |
| $m$                        |       |       | ns    | ns    | ns    | ns    | ns     | ns     | ns     | ns     | ns     | ns     | ns     | ns     | ns     | 1.19   |
| $r^2$                      |       |       |       |       |       |       |        |        |        |        |        |        |        |        |        | 0.93   |
| <20 $\mu\text{m}$ dinofl.  |       |       |       |       |       |       |        |        |        |        |        |        |        |        |        |        |
| $\mu$                      | -0.29 | -0.17 | -0.48 | -1.39 | -0.77 | 0.83  | 0.32   | -0.49  | -0.19  | -0.52  | 0.01   | -0.78  | -0.23  | -0.55  | -0.35  | -0.29  |
| $m$                        | ns    | ns    | 1.14  |       | 0.94  | 0.48  | 1.28   | ns     | ns     | ns     | ns     | ns     | ns     | ns     | 0.93   | ns     |
| $r^2$                      |       |       | 0.72  |       | 0.86  | 0.79  | 0.96   |        |        |        |        |        |        |        | 0.77   |        |
| >20 $\mu\text{m}$ dinofl.  |       |       |       |       |       |       |        |        |        |        |        |        |        |        |        |        |
| $\mu$                      | 0.96  | 1.53  | -0.79 | -0.37 | -0.30 | 0.31  | 1.19   | -0.48  | 0.02   | 0.26   | 0.52   | 0.32   | -0.23  | -0.02  | -0.38  | -0.50  |
| $m$                        | -0.53 | -0.71 | ns    | ns    | ns    | ns    | ns     | ns     | ns     | ns     | 2.08   | ns     | ns     | ns     | ns     | ns     |
| $r^2$                      | 0.78  | 0.88  |       |       |       |       |        |        |        |        | 0.88   |        |        |        |        |        |
| Mixo. dinofl.              |       |       |       |       |       |       |        |        |        |        |        |        |        |        |        |        |
| $\mu$                      | 0.26  | 0.10  | 0.32  | -0.14 | -0.61 | -0.04 | 0.63   | -0.17  | 0.06   | 1.30   | 0.12   | -0.75  | 0.21   | 0.24   | -0.03  | 0.03   |
| $m$                        | ns    | ns    | -0.65 | ns    | ns    | ns    | ns     | ns     | ns     | -0.97  | ns     | ns     | ns     | ns     | 0.47   | ns     |
| $r^2$                      |       |       | 0.72  |       |       |       |        |        |        | 0.90   |        |        |        |        | 0.87   |        |
| Het. dinofl.               |       |       |       |       |       |       |        |        |        |        |        |        |        |        |        |        |
| $\mu$                      | 1.17  | 0.28  | 0.29  | -1.04 | -0.22 | 1.88  | 1.02   | -0.34  | -0.01  | 0.19   | 0.47   | 0.05   | 0.12   | 0.23   | 0.54   | -0.06  |
| $m$                        | -0.58 | ns    | -1.39 | ns    | ns    | ns    | ns     | ns     | ns     | ns     | 1.00   | ns     | -0.60  | ns     | ns     | ns     |
| $r^2$                      | 0.79  |       | 0.90  |       |       |       |        |        |        |        | 0.76   |        | 0.80   |        |        |        |
| <20 $\mu\text{m}$ ciliates |       |       |       |       |       |       |        |        |        |        |        |        |        |        |        |        |
| $\mu$                      | -0.12 | 0.25  | 0.70  | 1.21  | -0.61 | 1.03  | 0.95   | -0.54  | 0.15   | -0.30  | 0.50   | 0.10   | -0.16  | 0.13   | 0.12   | -0.16  |
| $m$                        | ns    | ns    | -0.79 | ns    | ns    | ns    | ns     | ns     | ns     | ns     | ns     | ns     | ns     | ns     | ns     | ns     |
| $r^2$                      |       |       | 0.69  |       |       |       |        |        |        |        |        |        |        |        |        |        |
| >20 $\mu\text{m}$ ciliates |       |       |       |       |       |       |        |        |        |        |        |        |        |        |        |        |
| $\mu$                      | -0.08 | -0.17 | 0.03  | -0.71 | 0.26  | -1.05 | 0.17   | -1.71  | -0.45  | -0.44  | -0.73  | -1.26  | -0.14  | 0.06   | -0.20  | -1.07  |
| $m$                        | ns    | ns    | -0.70 | ns    | ns    | ns    | ns     | 0.55   | ns     | ns     | ns     | ns     | ns     | ns     | ns     | ns     |
| $r^2$                      |       |       | 0.74  |       |       |       |        | 0.84   |        |        |        |        |        |        |        |        |

Determination coefficient for the regression analysis is also provided. Positive  $m$  values indicate positive slope. ns, not significant regression equation ( $P > 0.05$ ); nd, not determined because not enough cells'.



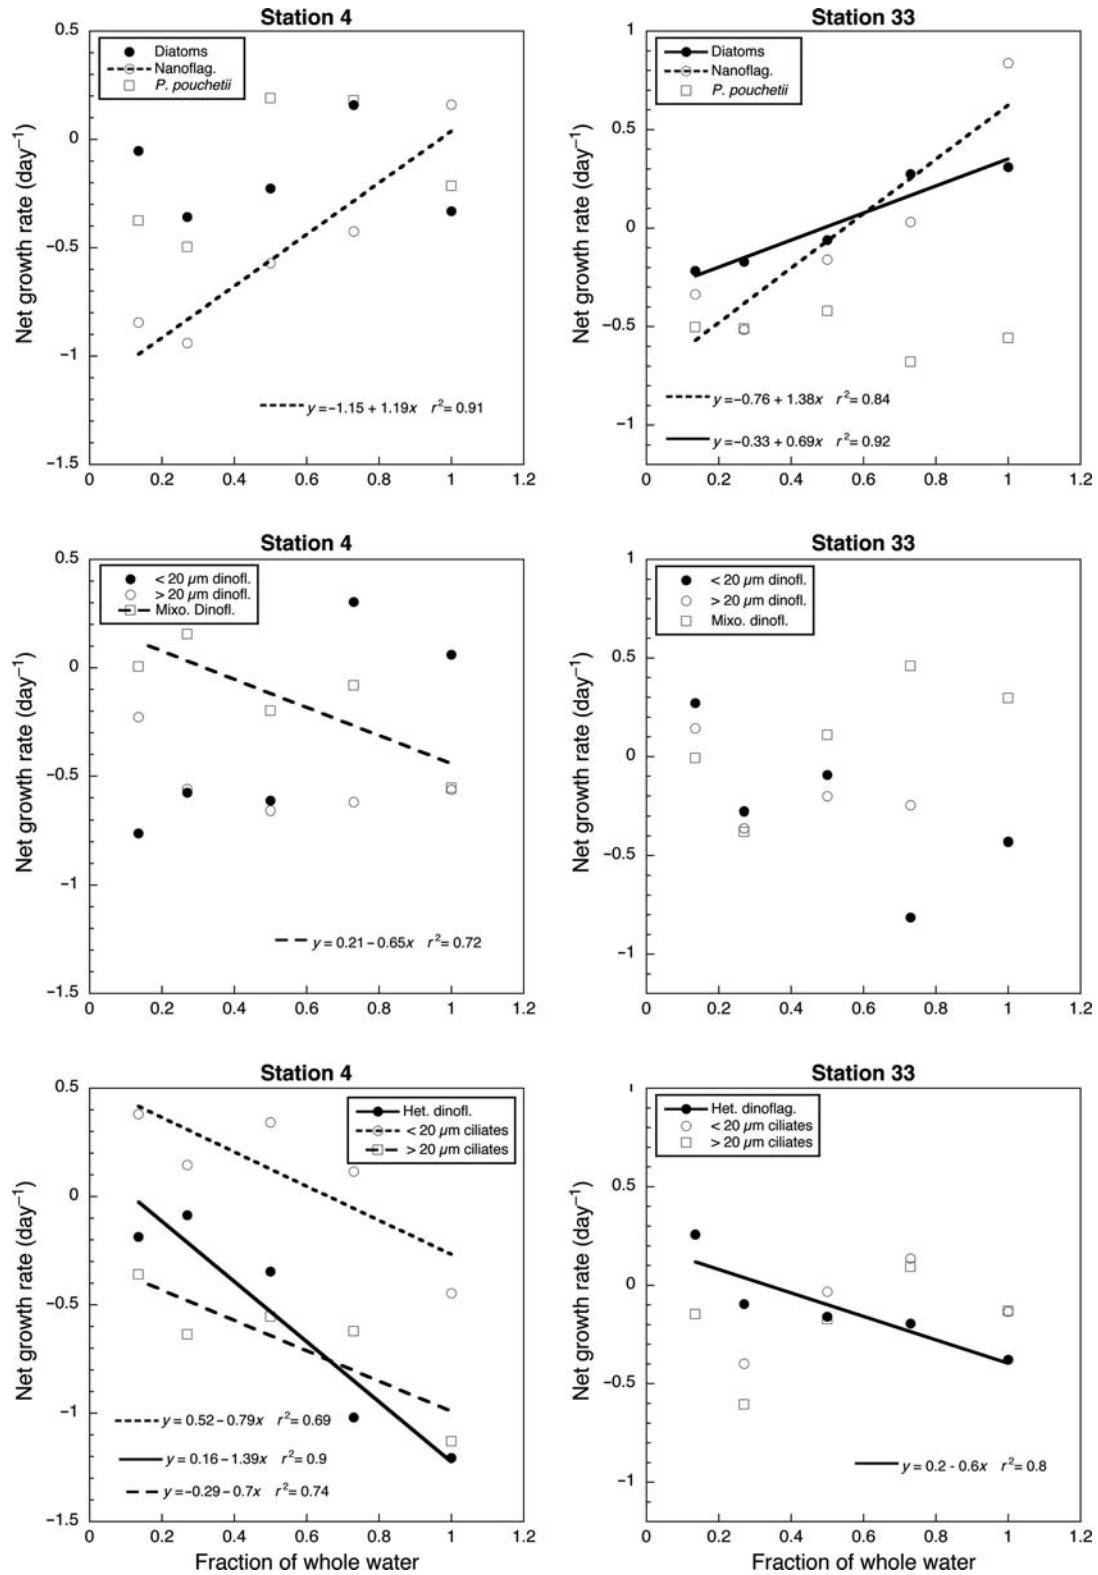

Fig. 6. Example of grazing dilution plots for the microbial components of the planktonic community of stations 4 (left) and 33 (right).

Despite the relatively high biomass of microzooplankton, the grazing rates on phytoplankton (Chl *a*) were low. Certainly, trophic relationships between predators and prey do not necessarily have to be directly related to biomass, especially in areas where annual blooms are intense. If a phytoplankton bloom is senescent, grazers, even if abundant, may not graze phytoplankton cells in poor health (the end of the bloom situation). Similar inconsistencies between grazing impacts and grazer biomass have also been reported for Antarctic waters (Caron *et al.*, 2000). Regarding the Arctic Ocean, we find contrasting results for microzooplankton grazing impact in different areas. For instance, during the summer along the western coast of Greenland, Levinsen *et al.* (Levinsen *et al.*, 1999) studied the microzooplankton grazing impact by indirect methods and concluded that if this group had a purely autotrophic diet they could remove 362% of primary daily production. Nevertheless, the authors pointed out that cannibalism could likely reduce the actual impact of this group on phytoplankton. Also by indirect measurements, Rysgaard *et al.* (Rysgaard *et al.*, 1999) estimated that the combined grazing activity of ciliates and dinoflagellates in Young Sound (NE Greenland) would potentially remove only 14% of the annual primary production, a value that contrasts strongly with the previous estimate. Levinsen and Nielsen (Levinsen and Nielsen, 2002) found that potential microzooplankton grazing could account for 32–55% of the primary production in Disko Bay. These data, as well as the 40–114% primary production daily grazed in Jones Sound (Paranjape, 1987), the 37–88% in Baffin Bay (Paranjape, 1987), the 64–97% in the Barents Sea (Verity *et al.*, 2002) and the 2–293% (average 110 and 81% of phytoplankton growth rates for >10  $\mu\text{m}$  and <10  $\mu\text{m}$  phytoplankton, respectively) grazed in the southeast Bering Sea (Olson and Strom, 2002), are much higher than the values observed in our study. Recent research in the high Western Arctic Ocean (Sherr *et al.*, 2009), however, advocates a lower control of microzooplankton grazing on primary producers (average  $22 \pm 26\%$ ). The study by Sherr *et al.* (Sherr *et al.*, 2009), even if in a different area, with lower average temperatures, and with a community of phytoplankton not dominated by *Phaeocystis*, but by diatoms, is the study that *a priori* seems more appropriate to contrast with ours; both were located in open waters near the ice-edge zone and both were conducted at high-latitudes using the same methodology. Our data agree with the results of the Sherr *et al.* (Sherr *et al.*, 2009) study, which does not show significant grazing in about half of the experiments at the fluorescence maximum and contains total average grazing rates of  $<0.1 \text{ day}^{-1}$ . Similarly, in the Sherr *et al.* (Sherr *et al.*, 2009) study, they found low and even negative values for

phytoplankton growth rates during summer. They attributed this natural mortality to low light levels (samples were collected at the base of the euphotic zone) and to post-bloom conditions (protist grazing rates were low because the diatom blooms were senescent).

Despite the overall low grazing rates, some associations between the distributions of several organisms seem to be evident. For instance, mixotrophic dinoflagellates were positively correlated with diatoms. Mixotrophy is widespread among dinoflagellates, and it is not uncommon that these organisms contribute significantly to the community grazing on phytoplankton (Stoecker, 1999; Stoecker *et al.*, 2009), and particularly on diatoms (Du Yoo *et al.*, 2009). Moreover, the role of mixotrophic dinoflagellates in the fate of primary producers is likely to have been underestimated for several reasons. First, the presence of their own chloroplasts may mask the detection of prey inside the organisms, and second, the different feeding mechanisms displayed by this group (direct engulfment, tube-feeding and pallium-feeding; Hansen and Calado, 1999) make it quite difficult to correctly assess their contribution to total community grazing. Because *pallium*-feeding and tube-feeding do not leave evident remains of the preyed cell inside the predator and because the *pallium* and peduncles are not persistent structures, they are not easily quantified when microscopically observing preserved samples. Therefore, we are of the opinion that a predator–prey association between armored mixotrophic dinoflagellates and diatoms is meaningful. Certainly, other microbial grazers, such as ciliates among others, can impact on diatoms (Aberle *et al.*, 2007), but we did not obtain proof of this behavior in our study. On the other hand, the diatom–dinoflagellate relationship has been widely suggested in the literature (e.g. Saito *et al.*, 2006; Sherr and Sherr, 2007; Calbet, 2008), although seldom quantified in natural communities (Archer *et al.*, 1996).

### Finding explanations for the low microzooplankton grazing impact, but the high net mortality rates of phytoplankton

It is difficult to ascertain whether the low grazing found in our study is a general characteristic describing the system or if it was the result of some particular conditions. It is surprising, however, that we found many negative net phytoplankton growth rates (based on Chl *a* changes) not associated with microzooplankton grazing. The simplest explanation for this would be that the incubation light level was not appropriate, the cells adjusting their Chl *a* contents to the new conditions. This could actually be the cause at some stations;

however, the same pattern persists in cell counts in many others. Therefore, we have to find alternative hypotheses, which may be non-exclusive.

#### *The natural mortality hypothesis*

Parallel to our study, Lasternas and Agustí (Lasternas and Agustí, in press) used a membrane permeability probe (Agustí and Sánchez, 2002) to estimate the natural mortality of the *P. pouchetii* community, and they observed that higher percentages of dead *P. pouchetii* cells (up to ca. 90% at some stations) were associated to both cold and less saline waters across the area studied. The mechanisms behind this mortality, not related to grazing rates, can be several. It could well be that we were facing a senescent community at the end of the bloom. On the other hand, we cannot disregard viruses as playing a role in controlling the population of these and other protists and responsible for the frequent negative growth rates (Baudoux et al., 2006; Jacobsen et al., 2007). Unfortunately, our experimental set up was not adequate for virus-related mortality quantification.

Given the contribution of *P. pouchetii* to the total phytoplankton biomass, the natural mortality of these algae could be driving the growth rates observed on the basis of Chl *a*. Corroborating this, we observed an inverse relationship between phytoplankton instantaneous growth rates and Chl *a* distribution. Although other groups of plankton could also have shown natural mortality rates, we do not have solid evidence of this.

#### *The Phaeocystis pouchetii hypothesis*

As previously mentioned, our cruise coincided with high abundances of *Phaeocystis pouchetii*, which commonly blooms in these waters in July (Schoemann et al., 2005). The peculiarities of the food web dominated by these algae make it difficult to extract general conclusions. We believe that our low grazing estimates (not significant at most of the stations) could be partially a consequence of the presence of *P. pouchetii*. We observed the presence of many colonies in the samples, although we have not been able to quantify the percentage of free cells and colonies in the Lugol preserved samples. However, it is quite likely that this species either introduced variability into the samples (colonies can be heterogeneously distributed in the samples) and precluded the establishment of significant regressions based on Chl *a*, evaded grazing when in colonial form (Hansen et al., 1994; Weisse et al., 1994; Tang, 2003), or chemically deterred grazers (Barnard et al., 1984; Nejstgaard et al., 2007; van Rijssel et al., 2007). Certainly, *P. pouchetii* seems the most obvious candidate when seeking chemical deterrence of grazing. Similar to macroalgae and other phytoplankters, *Phaeocystis* spp. exude chemicals that can interfere

with grazing activity (see review by van Rijssel et al., 2007). Although the chemicals involved in this process have not yet been identified, it has been suggested that grazing-activated DMSP cleavage by *P. pouchetii* contributes to grazing deterrence (Wolfe et al., 2000). Allelopathic interactions could also be responsible for the negative growth rates of a phytoplankton (and other protists) community, which apparently was not limited by nutrients.

Overall, we believe that the net transfer of energy to higher trophic levels in this ecosystem would be greatly diminished if the autotrophic community was dominated by *Phaeocystis*, provided that other groups not considered here (e.g. copepods) do not exert a strong impact on this alga. However, the low tolerance of *P. pouchetii* to relatively high temperatures (Schoemann et al., 2005), as shown by the reduced presence at St. 27 where temperatures reached 7.5°C, indicates a limited relevance of this species under global warming scenarios. Certainly, this does not mean that other *Phaeocystis* species, such as *P. globosa*, which is adapted to warmer waters, cannot replace *P. pouchetii*, further diminishing the trophic efficiency of the system because *P. globosa* is seldom consumed by zooplankton (see review by Nejstgaard et al., 2007).

#### *The dilution grazing artifact hypothesis*

Chl *a* is a rough proxy for phytoplankton because it does not capture the complexity of this group, and its use in dilution experiments has been questioned because chlorophyll content per cell may change during the incubation (McManus, 1995). Moreover, the need for a close examination of the microzooplankton community during dilution experiments to detect and correct possible artifacts has also been discussed (Dolan et al., 2000; Agis et al., 2007; Modigh and Franzè, 2009). To shed light on this point and to deepen our understanding of the food web interactions in Arctic waters, we further examined changes in the entire microbial community during the dilution experiments. We did not make any attempt to compare the rates obtained based on Chl *a*, with those derived from cell counts and their corresponding conversion to carbon because the uncertainties associated when depicting a trophic role (autotrophy versus heterotrophy) to unidentified dinoflagellates and nanoflagellates. Besides, the contribution of mixotrophic species at some stations (e.g. the mixotrophic ciliate *Laboea* sp. represented most of the planktonic biomass at St. 3; Supplementary Material online) precluded any comparison.

When opening the planktonic black box in the dilution experimental bottles, we faced unanticipated results suggesting a complex and intricate food web, in which choosing the major microbial grazers of

phytoplankton were not so straightforward. A clear example of a puzzling response was the occurrence of positive regression slopes between the net growth rates of certain groups against the dilution factor. Positive slopes for heterotrophs and mixotrophs, even if sometimes the result of complicated ecological interactions, can be easily interpreted as growth enhancement due to increased feeding in the more concentrated treatments. However, positive slopes of phytoplankton occur when the organism considered is adversely affected by the dilution treatment. The explanation for these particular responses is not easy because they can have different non-exclusive causes. For instance, they may either be the result of strong trophic cascade effects during the incubations (Calbet *et al.*, 2008), chemical grazing deterrence by the algae or other organisms, toxic effects of the filtered seawater (Landry, 1993), mixotrophs being important contributors of phytoplankton biomass (then, favored in less diluted conditions) or of complex cycling of nutrients between internal and external pools (Landry, 1993), because nutrients would be taken up by smaller algae more efficiently and would become limiting for larger phytoplankton. We do not believe that the last three hypotheses apply to our experiments for the following reasons: (i) any toxic effect would likely be persistently evident at all the groups and stations, (ii) some of the groups of phytoplankton showing positive slopes, as far as we know, were not mixotrophic (e.g. diatoms), and (iii) nutrients were supplied in excess. Therefore, either (or both) trophic cascades or grazing deterrence seem to be the most reasonable explanation. If *P. pouchetii* was responsible for the positive slopes found for diatoms and other groups, its effects would not be apparent at the stations where the haptophyte was not present (Stations 2 and 3). While this was the case and thus supporting the feeding deterrence hypothesis, it did not fully demonstrate the hypothesis because the response was not directly related to the *P. pouchetii* concentration.

We, therefore, contemplated the trophic cascade explanation for the positive slopes found in our (and others) study. It has been argued that changes of grazer abundance during dilution grazing incubation may result in results that are artifacts (Dolan *et al.*, 2000; Agis *et al.*, 2007; Modigh and Franzè, 2009). These changes usually involve a decrease in abundance in the most diluted treatments, the result of starvation. However, our experiments showed on many occasions the opposite, the grazers diminishing in the most concentrated treatments. This can be a consequence of predation from other microzooplankers, either protozoans (intra-guild predation) or metazoans (e.g. copepod nauplii; not included in our sampling), during the incubations.

It is relatively easy to mathematically simulate a dilution grazing experiment involving a grazer that reduces their abundance inversely related to the dilution level during the incubation. We can actually base our example on data from one of our experiments. For instance, we can use as an example the response of  $<20\ \mu\text{m}$  ciliates at Station 4, and the positive slope for nanoflagellates, one of their likely prey (Fig. 6). We assume nanoflagellates doubled their abundance in 24 h, and that  $<20\ \mu\text{m}$  ciliates were the only group grazing on them. If ciliate feeding rates were linearly related to food concentration, we will most likely obtain, after the incubation period, a negative slope for nanoflagellates when plotting net growth rates as function of the dilution level, as predicted by dilutions (although it would not be a true estimate of the natural grazing rate on this group because grazers varied their concentrations in the experimental bottles). However, if feeding was saturated, we could easily mimic the results found in the experiments using a constant feeding rate of only 76 nanoflagellates consumed per ciliate per day (Fig. 7). This happens because the grazing pressure is in this case only proportional to the abundance of grazers, and we have a higher net growth rate of grazers ( $<10\ \mu\text{m}$  ciliates) in the more concentrated treatments. Moreover, varying the concentration of grazers, prey and the growth and grazing rates, we can also obtain non-significant from zero grazing estimates, which are not true rates, but artifacts of the method in very special situations. This mathematical exercise was not intended

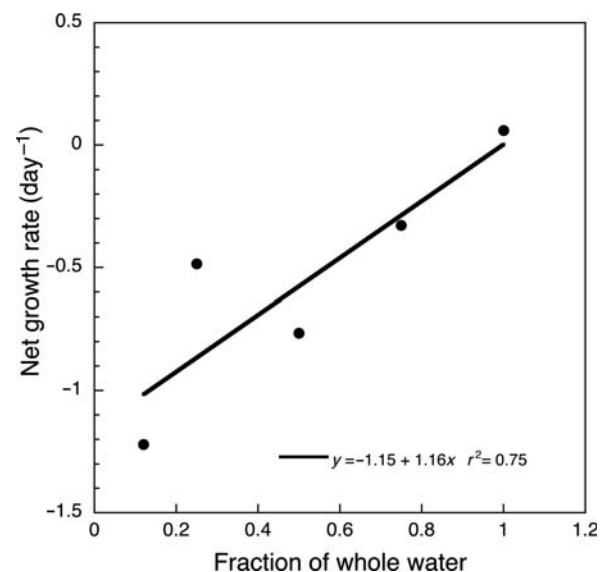

**Fig. 7.** Simulated outcome of a dilution grazing experiment using the abundance and growth rates of  $<20\ \mu\text{m}$  ciliates in St. 4 as grazers and the abundance of nanoflagellates as prey. See text for further details.



to correct our grazing rates, as suggested by Modigh and Franzè (Modigh and Franzè, 2009), because given the complexity of the food web we cannot anticipate the microzooplankton group responsible for most of the phytoplankton grazing impact. However, we can use our reasoning to prove that positive slopes (and non-significant slopes) are easily the result of a combination of trophic cascades during the incubations (the main grazers decreasing their abundance in the most concentrated treatments) with a saturated feeding responses. The picture complicates further if microzooplankton feeding behavior changes with food concentration, as described by Teixeira and Figueiras (Teixeira and Figueiras, 2009), and if there is nutrient limitation during the incubations. Actually, and regarding this latter artifact, severe nutrient limitation during the dilution experiments inversely proportional to the dilution level will most likely favor fake negative slopes, exaggerating the grazing activity of microzooplankton because phytoplankton instantaneous growth rates will be higher in the most diluted treatments, where more nutrients per cell are available.

In summary, the data presented here depict a planktonic Arctic community dominated by *P. pouchetii* and rich in microzooplankton, which at first sight did not seem to be exerting a strong control on a phytoplankton community in decline. However, several natural and causes as well as artifacts may have been playing important roles in some of our experiments, precluding clear grazing estimates in this very complex food web. Even though it may seem disappointing to conclude that our rates might not be actual estimates, but bound for the lower grazing impact of the microzooplankton in the area, they point out the need for presenting negative results, when these are not consequence of evident mistakes or artifacts (Dolan and McKeon, 2005). Only with a whole picture of the existing data, we will be able to extract solid conclusions on the dynamics of marine systems. Maybe in the future, someone will find the way of extracting information from such results. Specifically regarding dilution grazing experiments, this study calls for special caution when applying the technique, originally developed for oligotrophic areas, to rich environments where saturated feeding responses may be common. In any case, as previously suggested (Dolan et al., 2000; Agis et al., 2007; Modigh and Franzè, 2009), it is evident that we need a detailed examination of the grazer and prey dynamics during the incubations if we want to present trustable microzooplankton grazing estimates. By presenting data on counts-based rates, we will enhance our resolution and avoid artifacts associated with chlorophyll analysis. However, these sorts of data involve a considerable amount of time and are highly dependent on the taxonomic skills of the researcher.

## SUPPLEMENTARY DATA

Supplementary data can be found online at <http://plankt.oxfordjournals.org>.

## ACKNOWLEDGEMENTS

The authors wished to thank the crew of the BIO Hesperides and the special help of the technical staff of the UTM (D. Afonso, R. Ametller, J. Llinàs J. Pozo, J. Sanz, and X. Vidal) for their invaluable logistic help. Plankton composition was analyzed by Dr M. Delgado. Five anonymous reviewers highly contributed to improve earlier versions of the manuscript.

## FUNDING

This research was supported by the Spanish grants POL2006-0550/CTM to C.M.D. CTM2009-08783 to A.C., CTM2006-12344-C02-01 to M.A., CTM2007-60052 to E.S. and grant 2005SGR-00219 from the Generalitat de Catalunya to the research group, and a PhD fellowship, BES-2005-7491 to R.A.

## REFERENCES

- Aberle, N., Lengfellner, K. and Sommer, U. (2007) Spring bloom succession, grazing impact and herbivore selectivity of ciliate communities in response to winter warming. *Oecologia*, **150**, 668–681.
- Agis, M., Granda, A. and Dolan, J. R. (2007) A cautionary note: examples of possible microbial community dynamics in dilution grazing experiments. *J. Exp. Mar. Biol. Ecol.*, **341**, 176–183.
- Agustí, S. and Sánchez, C. M. (2002) Cell viability in natural phytoplankton communities quantified by a membrane permeability probe. *Limnol. Oceanogr.*, **47**, 818–828.
- Archer, S. D., Leakey, R. J. G. and Burkill, P. H. et al. (1996) Microbial dynamics in coastal waters of East Antarctica: herbivory by heterotrophic dinoflagellates. *Mar. Ecol. Prog. Ser.*, **139**, 239–255.
- Archer, S. D., Verity, P. G. and Stefels, J. (2000) Impact of microzooplankton on the progression and fate of the spring bloom in fjords of northern Norway. *Aquat. Microb. Ecol.*, **22**, 27–41.
- Barnard, W. R., Andreae, M. O. and Iverson, R. L. (1984) Dimethylsulde and *Phaeocystis poucheti* in the Southeastern Bering Sea. *Cont. Shelf. Res.*, **3**, 103–113.
- Baudoux, A.-C., Noordeloos, A. A. M. and Veldhuis, M. J. W. et al. (2006) Virally induced mortality of *Phaeocystis globosa* during a spring bloom in temperate coastal waters. *Aquat. Microb. Ecol.*, **44**, 201–217.
- Broglio, E., Saiz, E. and Calbet, A. et al. (2004) Trophic impact and prey selection by crustacean zooplankton on the microbial communities of an oligotrophic coastal area (NW Mediterranean Sea). *Aquat. Microb. Ecol.*, **35**, 65–78.



- Calbet, A. (2008) The trophic roles of microzooplankton in marine systems. *ICES J. Mar. Sci.*, **65**, 325–331.
- Calbet, A. and Landry, M. R. (2004) Phytoplankton growth, microzooplankton grazing, and carbon cycling in marine systems. *Limnol. Oceanogr.*, **49**, 51–57.
- Calbet, A. and Saiz, E. (2005) The ciliate-copepod link in marine ecosystems. *Aquat. Microb. Ecol.*, **38**, 157–167.
- Calbet, A., Trepal, I. and Almeda, R. *et al.* (2008) Impacts of micro- and nanograzers on phytoplankton assessed by standard and size-fractionated dilutions. *Aquat. Microb. Ecol.*, **50**, 154–156.
- Campbell, R. G., Sherr, E. B., Ashjian, C. J. *et al.* (2009) Mesozooplankton prey preference and grazing impact in the Western Arctic Ocean. *Deep-Sea Res. II*, **56**, 1274–1289.
- Caron, D. A., Dennett, M. R. and Lonsdale, D. J. *et al.* (2000) Microzooplankton herbivory in the Ross Sea, Antarctica. *Deep-Sea Res. II*, **47**, 3249–3272.
- Cavaliere, D. J., Parkinson, C. L. and Vinnikov, K. Y. (2003) 30-Year satellite record reveals contrasting Arctic and Antarctic decadal sea ice variability. *Geophys. Res. Lett.*, **30**, DOI: 10.1029/2003GL018031.
- Dolan, J. R. and McKeon, K. (2005) The reliability of grazing rate estimates from dilution experiments: Have we over-estimated rates of organic carbon consumption by microzooplankton? *Ocean Sci.*, **1**, 1–7.
- Dolan, J. R., Gallegos, C. L. and Moigis, A. (2000) Dilution effects on microzooplankton in dilution grazing experiments. *Mar. Ecol. Prog. Ser.*, **200**, 127–139.
- Du Yoo, Y., Jeong, H. J. and Kim, M. S. *et al.* (2009) Feeding by phototrophic red-tide dinoflagellates on the ubiquitous marine diatom *Skeletonema costatum*. *Euk. Microbiol.*, **56**, 413–420.
- Gallegos, C. L. (1989) Microzooplankton grazing on phytoplankton in the Rhode River, Maryland: nonlinear feeding kinetics. *Mar. Ecol. Prog. Ser.*, **57**, 23–33.
- Gifford, D. J., Fessenden, L. M. and Garrahan, P. R. *et al.* (1995) Grazing by microzooplankton and mesozooplankton in the high-latitude North Atlantic Ocean: Spring versus summer dynamics. *J. Geophys. Res.*, **100**, 6665–6675.
- Hansen, P. J. and Calado, A. J. (1999) Phagotrophic mechanisms and prey selection in free-living dinoflagellates. *J. Euk. Microbiol.*, **46**, 282–289.
- Hansen, B., Verity, P. and Falkenhaus, T. *et al.* (1994) On the trophic fate of *Phaeocystis pouchetii* (Harriot). 5. Trophic relationships between *Phaeocystis* and zooplankton: an assessment of methods and size dependence. *J. Plankton Res.*, **16**, 487–511.
- Jacobsen, A., Larsen, A. and Martínez-Martínez, J. *et al.* (2007) Susceptibility of colonies and colonial cells of *Phaeocystis pouchetii* (Haptophyta) to viral infection. *Aquat. Microb. Ecol.*, **48**, 105–112.
- Jakobsen, H. H. and Tang, K. W. (2002) Effects of protozoan grazing on colony formation in *phaeocystis globosa* (prymnesiophyceae) and the potential costs and benefits. *Aquat. Microb. Ecol.*, **27**, 261–273.
- Johansson, M., Gorokhova, E. and Larsson, U. (2004) Annual variability in ciliate community structure, potential prey and predators in the open northern Baltic Sea proper. *J. Plankton Res.*, **26**, 67–80.
- Landry, M. R. (1993) Estimating rates of growth and grazing mortality of phytoplankton by the dilution method. In Kemp, P. F., Sherr, B. F., Sherr, E. B. and Cole, J. L. (eds), *Handbook of Methods in Aquatic Microbial Ecology*. Lewis Publishers, Boca Raton, FL, pp. 715–722.
- Landry, M. R. and Hassett, R. P. (1982) Estimating the grazing impact of marine micro-zooplankton. *Mar. Biol.*, **67**, 283–288.
- Lasternas, S. and Agustí, S. Phytoplankton community structure during the record Arctic ice-melting of summer 2007. *Polar Biol.*, DOI 10.1007/s00300-010-0877-x.
- Lessard, E. J. and Swift, E. (1985) Species-specific grazing rates of heterotrophic dinoflagellates in oceanic waters, measured with a dual radioisotope technique. *Mar. Biol.*, **87**, 289–296.
- Levinsen, H. and Nielsen, T. G. (2002) The trophic role of marine pelagic ciliates and heterotrophic dinoflagellates in arctic and temperate coastal ecosystems: a cross-latitude comparison. *Limnol. Oceanogr.*, **47**, 427–439.
- Levinsen, H., Nielsen, T. G. and Hansen, B. W. (1999) Plankton community structure and carbon cycling on the western coast of Greenland during the stratified summer situation. II. Heterotrophic dinoflagellates and ciliates. *Aquat. Microb. Ecol.*, **6**, 217–232.
- Mcmanus, G. B. (1995) Phytoplankton abundance and pigment changes during simulated in situ dilution experiments in estuarine waters: possible artifacts caused by algal light adaptation. *J. Plankton Res.*, **17**, 1705–1716.
- Menden-Deuer, S. and Lessard, E. J. (2000) Carbon to volume relationships for dinoflagellates, diatoms, and other protist plankton. *Limnol. Oceanogr.*, **45**, 569–579.
- Modigh, M. and Franzè, G. (2009) Changes in phytoplankton and microzooplankton populations during grazing experiments at a Mediterranean coastal site. *J. Plankton Res.*, **31**, 853–864.
- Nejstgaard, J., Tang, K. and Steinke, M. *et al.* (2007) Zooplankton grazing on *Phaeocystis*: a quantitative review and future challenges. *Biogeochemistry*, **83**, 147–172.
- Olson, M. B. and Strom, S. L. (2002) Phytoplankton growth, microzooplankton herbivory and community structure in the southeast Bering Sea: insight into the formation and temporal persistence of an *Emiliania huxleyi* bloom. *Deep Sea Res. II*, **49**, 5969–5990.
- Paranjape, M. A. (1987) Grazing by microzooplankton in the eastern Canadian Arctic in summer 1983. *Mar. Ecol. Prog. Ser.*, **40**, 239–246.
- Parsons, T. R., Maita, Y. and Lalli, C. M. (1984) *A Manual of Chemical and Biological Methods for Sea Water Analysis*. Pergamon Press, Oxford.
- Rysgaard, S., Nielsen, T. G. and Hansen, B. W. (1999) Seasonal variation in nutrients, pelagic primary production and grazing in a high-Arctic coastal marine ecosystem, Young Sound, Northeast Greenland. *Mar. Ecol. Prog. Ser.*, **179**, 13–25.
- Saito, H., Ota, T., Suzuki, K. *et al.* (2006) Role of heterotrophic dinoflagellate *Gyrodinium* sp. in the fate of an iron induced diatom bloom. *Geophys. Res. Lett.*, **33**, L09602, doi, 10.1029/2005GL025366.
- Schoemann, W., Becquevort, S. and Stefels, J. *et al.* (2005) *Phaeocystis* blooms in the global ocean and their controlling mechanisms: a review. *J. Sea Res.*, **53**, 43–66.
- Sherr, E. B. and Sherr, B. F. (2007) Heterotrophic dinoflagellates: a significant component of microzooplankton biomass and major grazers of diatoms in the sea. *Mar. Ecol. Prog. Ser.*, **352**, 187–197.
- Sherr, E. B., Sherr, B. F. and Fessenden, L. (1997) Heterotrophic protists in the Central Arctic Ocean. *Deep-Sea Res. II*, **44**, 1665–1682.
- Sherr, E. B., Sherr, B. F. and Hartz, A. J. (2009) Microzooplankton grazing impact in the Western Arctic Ocean. *Deep-Sea Res. II*, **56**, 1264–1273.

- Stelfox-Widdicombe, C. E., Archer, S. D., Burkill, P. H. *et al.* (2004) Microzooplankton grazing in *Phaeocystis* and diatom-dominated waters in the southern North Sea in spring. *J. Sea Res.*, **51**, 37–51.
- Stoecker, D. K. (1999) Mixotrophy among dinoflagellates. *J. Euk. Microbiol.*, **46**, 397–401.
- Stoecker, D. K., Johnson, M. D. and de Vargas, C. *et al.* (2009) Acquired phototrophy in aquatic protists. *Aquat. Microb. Ecol.*, **57**, 279–310.
- Strom, S. L. and Fredrickson, K. A. (2008) Intense stratification leads to phytoplankton nutrient limitation and reduced microzooplankton grazing in the southeastern Bering Sea. *Deep-Sea Res. II*, **55**, 1761–1774.
- Tang, K. W. (2003) Grazing and colony size development in *Phaeocystis globosa* (Prymnesiophyceae): the role of a chemical signal. *J. Plankton Res.*, **25**, 831–842.
- Teixeira, I. G. and Figueiras, F. C. (2009) Feeding behaviour and non-linear responses in dilution experiments in a coastal upwelling system. *Aquat. Microb. Ecol.*, **55**, 53–63.
- van Rijssel, M., Alderkamp, A.-C. and Nejtgaard, J. C. *et al.* (2007) Haemolytic activity of living *Phaeocystis pouchetii* during mesocosm blooms. *Biogeochemistry*. doi, 10.1007/s10533-007-9095-1.
- Verity, P. G., Wassmann, P. and Frischer, M. E. *et al.* (2002) Grazing of phytoplankton by microzooplankton in the Barents Sea during early summer. *J. Mar. Syst.*, **38**, 109–123.
- Weisse, T. and Scheffel-Moser, U. (1990) Growth and grazing loss rates in single-celled *Phaeocystis* sp. (Prymnesiophyceae). *Mar. Biol.*, **106**, 153–158.
- Weisse, T., Tande, K. and Verity, P. *et al.* (1994) The trophic significance of *Phaeocystis* blooms. *J. Mar. Syst.*, **5**, 67–79.
- Whipple, S. J., Patten, B. P. and Verity, P. G. (2005) Life cycle of the marine alga *Phaeocystis*: a conceptual model to summarize literature and guide research. *J. Mar. Syst.*, **57**, 83–110.
- Wolfe, G. V., Levasseur, M. and Cantin, G. *et al.* (2000) DMSP and DMS dynamics and microzooplankton grazing in the Labrador Sea: application of the dilution technique. *Deep-Sea Res. I*, **47**, 2243–2264.
- Zarauz, L. and Irigoien, X. (2008) Effects of Lugol's fixation on the size structure of natural nano-microplankton samples, analyzed by means of an automatic counting method. *J. Plankton Res.*, **30**, 1297–1303.
- Zhang, J., Lindsay, R. and Steele, M. *et al.* (2008) What drove the dramatic retreat of Arctic sea ice during summer 2007? *Geophys. Res. Lett.*, **35**, L11505.
